# Supplementary material
Source: PubMed Central journal article supplement (PMC4262244)
Supplement: NIHMS646427-supplement-supplement_1.pdf [file NIHMS646427-supplement-supplement_1.pdf]

**SUPPLEMENTAL (ONLINE-ONLY) MATERIAL**

**eTable 1a. Parsimonious Model: Incremental Risk Factors for Death in Isolated Aortic Stenosis Group**

| <b>Risk Factor</b>                              | <b>Coefficient ± SE</b> | <b>P</b> | <b>Reliability (%)<sup>a</sup></b> |
|-------------------------------------------------|-------------------------|----------|------------------------------------|
| <i>Early hazard phase</i>                       |                         |          |                                    |
| Older age <sup>b</sup>                          | 1.9 ± 0.51              | .0001    | 75                                 |
| NYHA functional class III/IV                    | 0.88 ± 0.24             | .0003    | 74                                 |
| Lower HDL <sup>c</sup>                          | 0.097 ± 0.036           | .006     | 93                                 |
| Higher creatinine <sup>d</sup>                  | -1.2 ± 0.43             | .004     | 99                                 |
| Higher bilirubin                                | 0.25 ± 0.12             | .04      | 63                                 |
| Lower hematocrit <sup>e</sup>                   | -1.5 ± 0.51             | .004     | 47                                 |
| Lower LV diastolic volume <sup>f</sup>          | 0.10 ± 0.027            | .0002    | 78                                 |
| <i>Late hazard phase</i>                        |                         |          |                                    |
| Older age <sup>b</sup>                          | 3.7 ± 0.44              | <.0001   | 100                                |
| Larger BMI <sup>g</sup>                         | 0.41 ± 0.11             | .0003    | 68                                 |
| Syncope                                         | 0.34 ± 0.14             | .02      | 73                                 |
| Smoking                                         | 0.25 ± 0.11             | .02      | 74                                 |
| COPD                                            | 0.59 ± 0.16             | .0003    | 64                                 |
| Higher BUN <sup>h</sup>                         | 0.14 ± 0.036            | .0002    | 98                                 |
| Lower ejection fraction <sup>i</sup>            | -0.63 ± 0.29            | .03      | 96                                 |
| Larger LA diameter <sup>j</sup>                 | 0.86 ± 0.36             | .02      | 89                                 |
| LV mass index <sup>k</sup>                      | 0.73 ± 0.18             | <.0001   | 69                                 |
| Interaction: age and LV mass index <sup>l</sup> | -0.66 ± 0.21            | .002     |                                    |

a. Percent of times variable appeared in 250 bootstrap models.

b. (Age/75)<sup>2</sup>, squared transformation.

- c.  $(50/\text{HDL})^2$ , inverse squared transformation.
- d.  $(1/\text{creatinine})$ , inverse transformation.
- e.  $(\text{Hematocrit}/40)^2$ , squared transformation.
- f.  $(100/\text{LV diastolic volume})^2$ , inverse squared transformation.
- g.  $(\text{BMI}/30)^2$ , squared transformation.
- h.  $(\text{BUN}/20)^2$ , squared transformation.
- i.  $(\text{Ejection fraction}/55)$ , scaled variable.
- j.  $(\text{LA diameter}/4.5)$ , scaled variable.
- k.  $(\text{LV mass index}/125)^2$ , squared transformation.
- l. Interaction:  $(\text{age}/75)^2 \cdot (\text{LV mass index}/125)^2$ .

Key: *AS*, aortic stenosis; *BMI*, body mass index; *BUN*, blood urea nitrogen; *COPD*, chronic obstructive pulmonary disease; *HDL*, high-density lipoprotein; *LA*, left atrial; *LV*, left ventricle; *NYHA*, New York Heart Association; *SE*, standard error.

**eTable 1b. Parsimonious Model: Incremental Risk Factors for Death in Aortic Stenosis+Coronary Artery Disease Group**

| <b>Risk Factor</b>                     | <b>Coefficient ± SE</b> | <b>P</b> | <b>Reliability (%)<sup>a</sup></b> |
|----------------------------------------|-------------------------|----------|------------------------------------|
| <i>Early hazard phase</i>              |                         |          |                                    |
| Older age <sup>b</sup>                 | 2.01 ± 0.44             | <.0001   | 88                                 |
| Larger height/weight ratio             | 0.64 ± 0.19             | .0007    | 73                                 |
| NYHA functional class III/IV           | 0.58 ± 0.16             | .0002    | 81                                 |
| Aortic valve regurgitation 3+/4+       | 0.64 ± 0.036            | .02      | 83                                 |
| Tricuspid valve regurgitation 4+       | 1.04 ± 0.39             | .007     | 80                                 |
| Heart failure                          | 0.39 ± 0.16             | .02      | 50                                 |
| Carotid disease (less risk)            | -0.35 ± 0.15            | .02      | 62                                 |
| COPD                                   | 0.56 ± 0.18             | .002     | 53                                 |
| Treated diabetes                       | 0.57 ± 0.17             | .0006    | 76                                 |
| Higher creatinine <sup>c</sup>         | -0.69 ± 0.26            | .008     | 96                                 |
| Lower ejection fraction                | 0.061 ± 0.022           | .006     | 86                                 |
| Smaller AV prosthesis (Z-value)        | -0.27 ± 0.086           | .002     | 79                                 |
| Earlier date of operation <sup>d</sup> | 1.2 ± 0.39              | .003     | 76                                 |
| LMT stenosis ≥70%                      | 0.72 ± 0.26             | .005     | 96                                 |
| LAD stenosis ≥70%                      | 0.35 ± 0.16             | .03      | 96                                 |
| RCA stenosis ≥50%                      | 0.43 ± 0.18             | .02      | 96                                 |
| LCx stenosis >0%                       | 0.62 ± 0.27             | .02      | 96                                 |
| <i>Late hazard phase</i>               |                         |          |                                    |
| Older age <sup>b</sup>                 | 2.3 ± 0.24              | <.0001   | 100                                |
| Insulin-treated diabetes               | 0.72 ± 0.13             | <.0001   | 99                                 |
| Smoking                                | 0.26 ± 0.079            | .001     | 87                                 |
| Dialysis                               | 1.4 ± 0.33              | .0002    | 100                                |
| Higher BUN <sup>e</sup>                | 0.063 ± 0.015           | <.0001   | 100                                |

|                                            |               |        |    |
|--------------------------------------------|---------------|--------|----|
| Lower hematocrit <sup>f</sup>              | -0.69 ± 0.16  | <.0001 | 78 |
| Myocardial infarction                      | 0.24 ± 0.084  | .004   | 88 |
| Lower ejection fraction <sup>g</sup>       | -0.47 ± 0.18  | .01    | 88 |
| Larger LA diameter <sup>h</sup>            | 0.24 ± 0.43   | .6     | 98 |
| LV mass index <sup>i</sup>                 | -0.40 ± 0.22  | .07    | 87 |
| Interaction: LA diameter and LV mass index | 0.46 ± 0.18   | .01    |    |
| Atrial fibrillation surgical procedure     | 0.65 ± 0.20   | .002   | 96 |
| ASD/PFO suture closure                     | 0.82 ± 0.33   | .01    | 96 |
| ITA used (less risk)                       | -0.24 ± 0.078 | .002   | 96 |

a. Percent of times variable appeared in 250 bootstrap models.

b. (Age/75)<sup>2</sup>, squared transformation.

c. (1/creatinine), inverse transformation.

d. (1/[interval to date of operation from 1/1/91]), inverse transformation.

e. (BUN/20)<sup>2</sup>, squared transformation.

f. (Hematocrit/40)<sup>2</sup>, squared transformation.

g. (Ejection fraction/55), scaled variable.

h. (LA diameter/4.5), scaled variable.

i. (LV mass index/125)<sup>2</sup>, squared transformation.

j. Interaction: (LA diameter/4.5) • (LV mass index/125)<sup>2</sup>.

Key: *AS*, aortic stenosis; *ASD/PFO*, atrial septal defect/patent foramen ovale; *BUN*, blood urea nitrogen; *COPD*, chronic obstructive pulmonary disease; *ITA*, internal thoracic artery; *LA*, left atrial; *LAD*, left anterior descending coronary artery; *LCx*, left circumflex coronary artery; *LMT*, left main trunk; *LV*, left ventricle; *NYHA*, New York Heart Association; *RCA*, right coronary artery; *SE*, standard error.

**eTable 1c. Semi-Saturated Models. Incremental Risk Factors for Death after Procedure (bolded entries represent statistically significant factors)**

| Risk Factor                    | Isolated AS         |              | AS+CAD              |                  |
|--------------------------------|---------------------|--------------|---------------------|------------------|
|                                | Coefficient ± SE    | P            | Coefficient ± SE    | P                |
| <i>Early hazard phase</i>      |                     |              |                     |                  |
| Older age <sup>a</sup>         | <b>1.9 ± 0.55</b>   | <b>.0007</b> | <b>1.9 ± 0.45</b>   | <b>&lt;.0001</b> |
| Larger height/weight ratio     | 0.30 ± 0.31         | .3           | <b>0.54 ± 0.20</b>  | <b>.007</b>      |
| NYHA functional class III/IV   | <b>0.701 ± 0.25</b> | <b>.005</b>  | <b>0.55 ± 0.16</b>  | <b>.0004</b>     |
| AV regurgitation 3+/4+         | 0.39 ± 0.42         | .4           | <b>0.64 ± 0.27</b>  | <b>.02</b>       |
| TV regurgitation 4+            | 0.33 ± 0.59         | .6           | <b>1.03 ± 0.39</b>  | <b>.007</b>      |
| Lower HDL <sup>b</sup>         | 0.072 ± 0.051       | .2           | -0.019 ± 0.036      | .6               |
| Carotid disease (less risk)    | 0.097 ± 0.24        | .7           | <b>-0.35 ± 0.15</b> | <b>.02</b>       |
| COPD                           | 0.48 ± 0.302        | .11          | <b>0.48 ± 0.18</b>  | <b>.01</b>       |
| Treated diabetes               | 0.52 ± 0.30         | .08          | <b>0.53 ± 0.17</b>  | <b>.002</b>      |
| Higher creatinine <sup>c</sup> | <b>-1.2 ± 0.45</b>  | <b>.007</b>  | <b>-0.65 ± 0.26</b> | <b>.01</b>       |
| Higher bilirubin               | 0.23 ± 0.15         | .13          | 0.070 ± 0.11        | .5               |
| Lower hematocrit <sup>d</sup>  | <b>-1.3 ± 0.55</b>  | <b>.02</b>   | -0.65 ± 0.35        | .06              |
| Heart failure                  | 0.36 ± 0.26         | .17          | <b>0.35 ± 0.17</b>  | <b>.04</b>       |
| Lower ejection fraction        | 0.020 ± 0.041       | .6           | 0.062 ± 0.022       | .007             |

|                                        |                     |                  |                      |                  |
|----------------------------------------|---------------------|------------------|----------------------|------------------|
| Lower LV diastolic volume <sup>e</sup> | <b>0.11 ± 0.027</b> | <b>&lt;.0001</b> | -0.0071 ± 0.049      | .9               |
| Smaller AV prosthesis (Z-value)        | -0.037 ± 0.14       | .8               | <b>-0.25 ± 0.088</b> | <b>.004</b>      |
| Earlier date of operation <sup>f</sup> | 0.55 ± 0.65         | .4               | <b>1.3 ± 0.39</b>    | <b>.001</b>      |
| LMT stenosis ≥70%                      | —                   | —                | <b>0.73 ± 0.25</b>   | <b>.004</b>      |
| LAD stenosis ≥70%                      | —                   | —                | <b>0.36 ± 0.16</b>   | <b>.03</b>       |
| RCA stenosis ≥50%                      | —                   | —                | <b>0.42 ± 0.18</b>   | <b>.02</b>       |
| LCx stenosis >0%                       | —                   | —                | <b>0.63 ± 0.27</b>   | <b>.02</b>       |
| <b><i>Late hazard phase</i></b>        |                     |                  |                      |                  |
| Older age <sup>a</sup>                 | <b>3.6 ± 0.45</b>   | <b>&lt;.0001</b> | <b>2.1 ± 0.40</b>    | <b>&lt;.0001</b> |
| Larger BMI <sup>g</sup>                | <b>0.42 ± 0.11</b>  | <b>.0002</b>     | -0.062 ± 0.13        | .6               |
| Syncope                                | <b>0.33 ± 0.14</b>  | <b>.02</b>       | 0.20 ± 0.11          | .06              |
| Insulin-treated diabetes               | 0.11 ± 0.31         | .7               | <b>0.72 ± 0.13</b>   | <b>&lt;.0001</b> |
| Smoking                                | <b>0.29 ± 0.11</b>  | <b>.01</b>       | <b>0.26 ± 0.081</b>  | <b>.002</b>      |
| Dialysis                               | 0.81 ± 0.65         | .2               | <b>1.4 ± 0.32</b>    | <b>.0001</b>     |
| Higher BUN <sup>h</sup>                | <b>0.12 ± 0.037</b> | <b>.002</b>      | <b>0.061 ± 0.015</b> | <b>&lt;.0001</b> |
| Lower hematocrit <sup>e</sup>          | -0.42 ± 0.26        | .11              | <b>-0.64 ± 0.16</b>  | <b>.0001</b>     |
| COPD                                   | <b>0.58 ± 0.17</b>  | <b>.0006</b>     | 0.12 ± 0.12          | .3               |
| Myocardial infarction                  | 0.19 ± 0.18         | .3               | <b>0.24 ± 0.083</b>  | <b>.004</b>      |
| Lower ejection fraction <sup>i</sup>   | <b>-0.56 ± 0.27</b> | <b>.04</b>       | <b>-0.47 ± 0.18</b>  | <b>.01</b>       |
| Larger LA diameter <sup>j</sup>        | 0.84 ± 0.67         | .2               | 0.26 ± 0.43          | .6               |

|                                                         |                     |             |                      |             |
|---------------------------------------------------------|---------------------|-------------|----------------------|-------------|
| LV mass index <sup>k</sup>                              | 0.60 ± 0.51         | .2          | -0.54 ± 0.31         | .09         |
| Interaction: LA diameter and LV mass index <sup>l</sup> | 0.08 ± 0.40         | .8          | <b>0.46 ± 0.18</b>   | <b>.01</b>  |
| Interaction: age and LV mass index <sup>m</sup>         | <b>-0.61 ± 0.21</b> | <b>.004</b> | 0.13 ± 0.22          | .6          |
| Atrial fibrillation surgical procedure                  | 0.34 ± 0.41         | .4          | <b>0.66 ± 0.20</b>   | <b>.001</b> |
| ASD/PFO suture closure                                  | -0.16 ± 0.55        | .8          | <b>0.84 ± 0.26</b>   | <b>.001</b> |
| ITA used (less risk)                                    | —                   | —           | <b>-0.24 ± 0.079</b> | <b>.002</b> |

a. (Age/75)<sup>2</sup>, squared transformation.

b. (50/HDL)<sup>2</sup>, inverse squared transformation.

c. (1/creatinine), inverse transformation.

d. (Hematocrit/40)<sup>2</sup>, squared transformation.

e. (100/LV diastolic volume)<sup>2</sup>, inverse squared transformation.

f. (1/[interval to date of operation from 1/1/91]), inverse transformation.

g. (BMI/30)<sup>2</sup>, squared transformation.

h. (BUN/20)<sup>2</sup>, squared transformation.

i. (Ejection fraction/55), scaled variable.

j. (LA diameter/4.5), scaled variable.

k. (LV mass index/125)<sup>2</sup>, squared transformation.

l. Interaction:  $(LA \text{ diameter}/4.5) \cdot (LV \text{ mass index}/125)^2$ .

m. Interaction:  $(age/75)^2 \cdot (LV \text{ mass index}/125)^2$ .

Key: *AS*, aortic stenosis; *ASD/PFO*, atrial septal defect/patent foramen ovale; *AV*, aortic valve; *BMI*, body mass index; *BUN*, blood urea nitrogen; *CAD*, coronary artery disease; *COPD*, chronic obstructive pulmonary disease; *HDL*, high-density lipoprotein; *ITA*, internal thoracic artery; *LA*, left atrial; *LAD*, left anterior descending coronary artery; *LCx*, left circumflex coronary artery; *LMT*, left main trunk; *LV*, left ventricle; *NYHA*, New York Heart Association; *RCA*, right coronary artery; *SE*, standard error; *TV*, tricuspid valve.



**eTable 2. Postoperative Morbidity and Mortality before and after Matching**

| Variable                                                           | Before Matching          |                     |          | After Matching           |                     |          |
|--------------------------------------------------------------------|--------------------------|---------------------|----------|--------------------------|---------------------|----------|
|                                                                    | Isolated AS<br>(n=1,637) | AS+CAD<br>(n=2,286) | <i>P</i> | Isolated AS<br>(n=1,082) | AS+CAD<br>(n=1,082) | <i>P</i> |
| Hospital death                                                     | 21 (1.3)                 | 55 (2.4)            | .01      | 19 (1.8)                 | 19 (1.8)            | >.9      |
| Myocardial infarction                                              | 4 (0.24)                 | 10 (0.44)           | .3       | 4 (0.31)                 | 7 (0.65)            | .4       |
| Septicemia                                                         | 26 (1.6)                 | 63 (2.8)            | .02      | 22 (2.0)                 | 24 (2.2)            | .8       |
| Permanent stroke                                                   | 25 (1.5)                 | 53 (2.3)            | .08      | 21 (1.9)                 | 24 (2.2)            | .6       |
| Atrial fibrillation                                                | 531 (32)                 | 829 (36)            | .01      | 367 (34)                 | 387 (36)            | .4       |
| Deep sternal wound infection                                       | 12 (0.73)                | 22 (0.96)           | .4       | 9 (0.83)                 | 6 (0.55)            | .4       |
| Reoperation for bleeding/tamponade                                 | 60 (3.7)                 | 102 (4.5)           | .2       | 41 (3.8)                 | 51 (4.7)            | .3       |
| Cardiac reoperation excluding valve dysfunction or graft occlusion | 19 (1.2)                 | 25 (1.1)            | .8       | 15 (1.4)                 | 10 (0.92)           | .3       |
| Other noncardiac reoperation                                       | 19/1,101<br>(1.7)        | 37/1,344<br>(2.8)   | .09      | 13/693<br>(1.9)          | 12/665<br>(1.8)     | .9       |
| Renal failure                                                      | 58 (3.5)                 | 146 (6.4)           | <.0001   | 49 (4.5)                 | 52 (4.8)            | .8       |

|                                  |                   |                   |        |                 |                 |      |
|----------------------------------|-------------------|-------------------|--------|-----------------|-----------------|------|
| Renal failure requiring dialysis | 13 (0.79)         | 46 (2.0)          | .002   | 12 (1.1)        | 16 (1.5)        | .4   |
| Prolonged ventilation (>24 h)    | 70/1,101<br>(6.4) | 188/1,344<br>(14) | <.0001 | 46/693<br>(6.6) | 72/665<br>(11)  | .006 |
| New permanent pacemaker          | 40/1,573<br>(2.5) | 72/2,170<br>3.3   | .17    | 28/1,024<br>2.7 | 33/1,037<br>3.2 | .5   |

---

Key: *AS*, aortic stenosis; *CAD*, coronary artery disease.

**eTable 3a. Unmatched vs. Matched Patient Characteristics of Patients with Isolated Severe Aortic Stenosis**

| Characteristic                     | Unmatched<br>(n=555) |            | Matched<br>(n=1,082) |            | P      |
|------------------------------------|----------------------|------------|----------------------|------------|--------|
|                                    | n <sup>a</sup>       | No. (%)    | n <sup>a</sup>       | No. (%)    |        |
| <i>Demography</i>                  |                      |            |                      |            |        |
| Female                             | 555                  | 319 (57)   | 1,082                | 450 (42)   | <.0001 |
| Age (years)                        | 555                  | 64 ± 11    | 1,082                | 73 ± 9.4   | <.0001 |
| BSA (m <sup>2</sup> )              | 548                  | 2.0 ± 0.30 | 1,059                | 2.0 ± 0.26 | .9     |
| <i>Symptoms</i>                    |                      |            |                      |            |        |
| Preoperative NYHA functional class | 548                  |            | 1,059                |            | <.0001 |
| I                                  |                      | 173 (32)   |                      | 222 (21)   |        |
| II                                 |                      | 277 (51)   |                      | 558 (53)   |        |
| III                                |                      | 92 (17)    |                      | 233 (22)   |        |
| IV                                 |                      | 6 (1.1)    |                      | 46 (4.3)   |        |
| Canadian Angina class              | 398                  |            | 833                  |            | .4     |
| 0                                  |                      | 171 (43)   |                      | 366 (44)   |        |
| I                                  |                      | 116 (29)   |                      | 275 (33)   |        |
| II                                 |                      | 97 (24)    |                      | 163 (20)   |        |
| III                                |                      | 13 (3.3)   |                      | 26 (3.1)   |        |
| IV                                 |                      | 1 (0.25)   |                      | 3 (0.36)   |        |
| Syncope                            | 411                  | 56 (14)    | 860                  | 120 (14)   | .9     |
| Dyspnea on exertion                | 381                  | 195 (51)   | 789                  | 418 (53)   | .6     |
| Shortness of breath                | 381                  | 236 (62)   | 788                  | 451 (57)   | .13    |
| Paroxysmal nocturnal dyspnea       | 381                  | 23 (6.0)   | 787                  | 61 (7.8)   | .3     |
| Orthopnea                          | 381                  | 45 (12)    | 787                  | 105 (13)   | .5     |

**Valve pathology**

|                                        |     |          |       |          |        |
|----------------------------------------|-----|----------|-------|----------|--------|
| Pure aortic stenosis                   | 549 | 425 (77) | 1,054 | 778 (74) | .11    |
| Mixed aortic stenosis/regurgitation    | 549 | 109 (29) | 1,054 | 223 (21) | .5     |
| Bicuspid aortic valve                  | 555 | 361 (65) | 1,082 | 298 (28) | <.0001 |
| Mitral valve regurgitation severity    | 527 |          | 982   |          | <.0001 |
| None                                   |     | 333 (63) |       | 478 (49) |        |
| Mild                                   |     | 125 (24) |       | 294 (30) |        |
| Moderate                               |     | 60 (11)  |       | 158 (16) |        |
| Moderately severe                      |     | 7 (1.3)  |       | 43 (4.4) |        |
| Severe                                 |     | 2 (0.38) |       | 9 (0.92) |        |
| Tricuspid valve regurgitation severity | 528 |          | 990   |          | .03    |
| None                                   |     | 377 (71) |       | 643 (65) |        |
| Mild                                   |     | 107 (20) |       | 211 (21) |        |
| Moderate                               |     | 29 (5.5) |       | 91 (9.2) |        |
| Moderately severe                      |     | 11 (2.1) |       | 31 (3.1) |        |
| Severe                                 |     | 4 (0.76) |       | 14 (1.4) |        |

**Cardiac comorbidity**

|                                |     |          |       |          |        |
|--------------------------------|-----|----------|-------|----------|--------|
| Previous myocardial infarction | 555 | 9 (1.6)  | 1,082 | 117 (11) |        |
| Atrial fibrillation/flutter    | 501 | 24 (4.8) | 957   | 90 (9.4) | .002   |
| Complete heart block           | 501 | 7 (1.4)  | 951   | 55 (5.8) | <.0001 |
| Ventricular arrhythmia         | 510 | 46 (9.0) | 982   | 121 (12) | .06    |
| Heart failure                  | 555 | 73 (13)  | 1,082 | 257 (24) | <.0001 |

**Noncardiac comorbidity**

|                             |     |          |       |          |        |
|-----------------------------|-----|----------|-------|----------|--------|
| Peripheral arterial disease | 555 | 8 (1.4)  | 1,082 | 57 (5.3) | .0002  |
| Carotid disease             | 555 | 76 (14)  | 1,082 | 424 (39) | <.0001 |
| Stroke                      | 555 | 17 (3.1) | 1,082 | 85 (7.9) | .0001  |

|                                        |     |             |       |             |        |
|----------------------------------------|-----|-------------|-------|-------------|--------|
| Hypertension                           | 555 | 281 (51)    | 1,082 | 782 (72)    | <.0001 |
| Insulin-treated diabetes               | 545 | 6 (1.1)     | 1,055 | 55 (5.2)    | <.0001 |
| Pharmacologically treated diabetes     | 547 | 44 (8.0)    | 1,055 | 199 (19)    | <.0001 |
| BUN (mg·dL <sup>-1</sup> )             | 549 | 18 ± 6.9    | 1,057 | 21 ± 8.7    | <.0001 |
| Creatinine (mg·dL <sup>-1</sup> )      | 548 | 0.94 ± 0.39 | 1,058 | 1.08 ± 0.47 | <.0001 |
| Preoperative renal dialysis            | 479 | 3 (0.63)    | 898   | 9 (1)       | .5     |
| Chronic obstructive pulmonary disease  | 555 | 69 (12)     | 1,082 | 132 (12)    | .9     |
| Smoking                                | 553 | 267 (48)    | 1,077 | 536 (50)    | .6     |
| Cholesterol (mg·dL <sup>-1</sup> )     | 453 | 195 ± 46    | 813   | 183 ± 44    | <.0001 |
| Triglycerides (mg·dL <sup>-1</sup> )   | 452 | 133 ± 77    | 810   | 132 ± 74    | .9     |
| HDL cholesterol (mg·dL <sup>-1</sup> ) | 453 | 58 ± 19     | 808   | 51 ± 16     | <.0001 |
| LDL cholesterol (mg·dL <sup>-1</sup> ) | 453 | 111 ± 40    | 807   | 106 ± 38    | .04    |
| Bilirubin (mg·dL <sup>-1</sup> )       | 529 | 0.63 ± 0.33 | 1,000 | 0.69 ± 0.52 | .02    |
| Hematocrit (%)                         | 534 | 40 ± 5.2    | 1,017 | 38 ± 5.5    | <.0001 |
| <b><i>Concomitant procedures</i></b>   |     |             |       |             |        |
| Mitral valve repair                    | 555 | 5 (0.9)     | 1,082 | 17 (1.6)    | .3     |
| Tricuspid valve repair                 | 555 | 7 (1.3)     | 1,082 | 26 (2.4)    | .12    |
| Aortic endarterectomy                  | 555 | 12 (2.2)    | 1,082 | 37 (3.4)    | .2     |
| Any atrial fibrillation procedure      | 555 | 23 (4.1)    | 1,082 | 74 (6.8)    | .03    |
| Septal myectomy                        | 555 | 9 (1.6)     | 1,082 | 21 (1.9)    | .6     |
| ASD/PFO suture closure                 | 555 | 11 (2.0)    | 1,082 | 16 (1.5)    | .4     |
| <b><i>Aortic valve prosthesis</i></b>  |     |             |       |             |        |
| Valve size (mm)                        | 555 |             | 1,082 |             | .2     |
| 19                                     |     | 77 (14)     |       | 163 (15)    |        |
| 21                                     |     | 171 (31)    |       | 312 (29)    |        |
| 23                                     |     | 179 (32)    |       | 353 (33)    |        |

|                             |     |              |       |              |     |
|-----------------------------|-----|--------------|-------|--------------|-----|
| 25                          |     | 103 (18)     |       | 200 (18)     |     |
| 27                          |     | 18 (3.2)     |       | 50 (4.6)     |     |
| 29                          |     | 7 (1.3)      |       | 4 (0.37)     |     |
| Standardized size (Z-value) | 546 | -0.42 ± 1.01 | 1,059 | -0.42 ± 0.99 | >.9 |

---

a. Patients with data available.

Key: *AS*, aortic stenosis, *ASD/PFO*, atrial septal defect/patent foramen ovale, *BSA*, body surface area; *BUN*, blood urea nitrogen; *CAD*, coronary artery disease, *HDL*, high-density lipoprotein; *LAD*, left anterior descending coronary artery; *LCx*, left circumflex coronary artery; *LDL*, low-density lipoprotein; *LMT*, left main trunk; *NYHA*, New York Heart Association; *RCA*, right coronary artery; *SD*, standard deviation.

**eTable 3b. Preoperative Echocardiographic Measurements of Unmatched vs. Matched Patients with Isolated Severe Aortic Stenosis**

| Variable                         | Unmatched<br>(n=555) |             | Matched<br>(n=1,082) |             | P      |
|----------------------------------|----------------------|-------------|----------------------|-------------|--------|
|                                  | n <sup>a</sup>       | Mean ± SD   | n <sup>a</sup>       | Mean ± SD   |        |
| <i>Aortic valve hemodynamics</i> |                      |             |                      |             |        |
| Area (cm <sup>2</sup> )          | 484                  | 0.65 ± 0.14 | 942                  | 0.65 ± 0.14 | .3     |
| Mean gradient (mmHg)             | 499                  | 55 ± 16     | 969                  | 50 ± 16     | <.0001 |
| Peak gradient (mmHg)             | 499                  | 94 ± 25     | 975                  | 84 ± 25     | <.0001 |
| <i>LV geometry</i>               |                      |             |                      |             |        |
| Morphology                       |                      |             |                      |             |        |
| Posterior wall thickness (cm)    | 498                  | 1.3 ± 0.23  | 932                  | 1.3 ± 0.24  | .005   |
| Septal thickness (cm)            | 501                  | 1.4 ± 0.30  | 939                  | 1.5 ± 0.28  | .0007  |
| Mass index (g·m <sup>-2</sup> )  | 490                  | 120 ± 41    | 908                  | 132 ± 43    | <.0001 |
| End-diastolic diameter (cm)      | 501                  | 4.5 ± 0.75  | 945                  | 4.6 ± 0.82  | .001   |
| End-systolic diameter (cm)       | 492                  | 2.8 ± 0.78  | 940                  | 3.01 ± 0.86 | <.0001 |
| Function                         |                      |             |                      |             |        |
| Ejection fraction (%)            | 522                  | 57 ± 8.8    | 987                  | 54 ± 11     | <.0001 |
| <i>Left atrium</i>               |                      |             |                      |             |        |
| Diameter (cm)                    | 465                  | 3.9 ± 0.73  | 887                  | 4.2 ± 0.75  | <.0001 |

a. Patients with data available.

Key: AS, aortic stenosis, CAD, coronary artery disease; SD, standard deviation.

**eTable 4a. Unmatched vs. Matched Patient Characteristics of Patients with Severe Aortic Stenosis and Coronary Artery Disease**

| Variable                           | Unmatched<br>(n=1,204) |            | Matched<br>(n=1,082) |            | P      |
|------------------------------------|------------------------|------------|----------------------|------------|--------|
|                                    | n <sup>a</sup>         | No. (%)    | n <sup>a</sup>       | No. (%)    |        |
| <i>Demography</i>                  |                        |            |                      |            |        |
| Female                             | 1,204                  | 316 (26)   | 1,082                | 458 (42)   | <.0001 |
| Age (y)                            | 1,204                  | 77 ± 7.2   | 1,082                | 73 ± 8.6   | <.0001 |
| BSA (m <sup>2</sup> )              | 1,197                  | 2.0 ± 0.25 | 1,066                | 2.0 ± 0.26 | .4     |
| <i>Symptoms</i>                    |                        |            |                      |            |        |
| Preoperative NYHA functional class | 1,197                  |            | 1,066                |            | <.0001 |
| I                                  |                        | 119 (9.9)  |                      | 227 (21)   |        |
| II                                 |                        | 621 (52)   |                      | 559 (52)   |        |
| III                                |                        | 334 (28)   |                      | 239 (22)   |        |
| IV                                 |                        | 123 (10)   |                      | 41 (3.8)   |        |
| Canadian Angina class              | 1,064                  |            | 882                  |            | <.0001 |
| 0                                  |                        | 317 (30)   |                      | 307 (35)   |        |
| I                                  |                        | 239 (22)   |                      | 230 (26)   |        |
| II                                 |                        | 370 (35)   |                      | 286 (32)   |        |
| III                                |                        | 109 (10)   |                      | 53 (6.01)  |        |
| IV                                 |                        | 29 (2.7)   |                      | 6 (0.68)   |        |
| Syncope                            | 1,032                  | 141 (14)   | 860                  | 130 (15)   | .4     |
| Dyspnea on exertion                | 971                    | 487 (50)   | 800                  | 410 (51)   | .6     |
| Shortness of breath                | 971                    | 513 (53)   | 801                  | 463 (58)   | .04    |
| Paroxysmal nocturnal dyspnea       | 971                    | 102 (11)   | 800                  | 69 (8.6)   | .2     |
| Orthopnea                          | 971                    | 120 (12)   | 801                  | 111 (14)   | .4     |



***Valve pathology***

|                                        |       |           |       |          |        |
|----------------------------------------|-------|-----------|-------|----------|--------|
| Pure aortic stenosis                   | 1,163 | 888 (76)  | 1,056 | 794 (75) | .5     |
| Mixed aortic stenosis/regurgitation    | 1,163 | 243 (21)  | 1,056 | 225 (21) | .8     |
| Bicuspid aortic valve                  | 1,204 | 115 (9.6) | 1,082 | 296 (27) | <.0001 |
| Mitral valve regurgitation severity    | 1,119 |           | 977   |          | <.0001 |
| None                                   |       | 433 (39)  |       | 490 (50) |        |
| Mild                                   |       | 350 (31)  |       | 287 (29) |        |
| Moderate                               |       | 222 (20)  |       | 150 (15) |        |
| Moderately severe                      |       | 92 (8.2)  |       | 41 (4.2) |        |
| Severe                                 |       | 22 (2.0)  |       | 9 (0.92) |        |
| Tricuspid valve regurgitation severity | 1,115 |           | 980   |          | .07    |
| None                                   |       | 693 (62)  |       | 624 (64) |        |
| Mild                                   |       | 243 (22)  |       | 219 (22) |        |
| Moderate                               |       | 133 (12)  |       | 87 (8.9) |        |
| Moderately severe                      |       | 32 (2.9)  |       | 42 (4.3) |        |
| Severe                                 |       | 14 (1.3)  |       | 8 (0.82) |        |

***Coronary artery disease***

|                                        |       |          |       |          |        |
|----------------------------------------|-------|----------|-------|----------|--------|
| Number of systems diseased $\geq 50\%$ | 1,204 |          | 1,080 |          | <.0001 |
| 0                                      |       | 32 (2.7) |       | 73 (6.8) |        |
| 1                                      |       | 330 (27) |       | 473 (44) |        |
| 2                                      |       | 423 (35) |       | 322 (30) |        |
| 3                                      |       | 419 (35) |       | 212 (20) |        |
| LMT disease $\geq 50\%$                | 1,059 | 189 (18) | 973   | 107 (11) | <.0001 |
| LAD system disease $\geq 50\%$         | 1,187 | 915 (77) | 1,062 | 709 (67) | <.0001 |
| LCx system disease $\geq 50\%$         | 1,153 | 679 (59) | 1,036 | 455 (44) | <.0001 |
| RCA system disease $\geq 50\%$         | 1,204 | 839 (70) | 1,082 | 589 (54) | <.0001 |

**Cardiac comorbidity**

|                                |       |          |       |          |        |
|--------------------------------|-------|----------|-------|----------|--------|
| Previous myocardial infarction | 1,204 | 540 (45) | 1,082 | 112 (10) | <.0001 |
| Atrial fibrillation/flutter    | 1,082 | 125 (12) | 927   | 79 (8.5) | .02    |
| Complete heart block           | 1,076 | 64 (5.9) | 926   | 51 (5.5) | .7     |
| Ventricular arrhythmia         | 1,107 | 144 (13) | 967   | 130 (13) | .8     |
| Heart failure                  | 1,204 | 443 (37) | 1,082 | 248 (23) | <.0001 |

**Noncardiac comorbidity**

|                                        |       |            |       |             |        |
|----------------------------------------|-------|------------|-------|-------------|--------|
| Peripheral arterial disease            | 1,204 | 213 (18)   | 1,082 | 65 (6.0)    | <.0001 |
| Carotid disease                        | 1,204 | 785 (65)   | 1,082 | 430 (40)    | <.0001 |
| Stroke                                 | 1,204 | 143 (12)   | 1,082 | 78 (7.2)    | .0002  |
| Hypertension                           | 1,204 | 1,013 (84) | 1,082 | 798 (74)    | <.0001 |
| Insulin-treated diabetes               | 1,157 | 159 (14)   | 1,056 | 53 (5.0)    | <.0001 |
| Pharmacologically treated diabetes     | 1,160 | 381 (33)   | 1,059 | 201 (19)    | <.0001 |
| BUN (mg·dL <sup>-1</sup> )             | 1,187 | 25 ± 12    | 1,062 | 21 ± 9.6    | <.0001 |
| Creatinine (mg·dL <sup>-1</sup> )      | 1,182 | 1.2 ± 0.63 | 1,053 | 1.1 ± 0.51  | <.0001 |
| Preoperative renal dialysis            | 1,021 | 20 (2.0)   | 908   | 14 (1.5)    | .5     |
| Chronic obstructive pulmonary disease  | 1,204 | 178 (15)   | 1,082 | 149 (14)    | .5     |
| Smoking                                | 1,189 | 718 (60)   | 1,077 | 529 (49)    | <.0001 |
| Cholesterol (mg·dL <sup>-1</sup> )     | 849   | 177 ± 47   | 834   | 186 ± 45    | <.0001 |
| Triglycerides (mg·dL <sup>-1</sup> )   | 839   | 136 ± 82   | 829   | 134 ± 77    | .8     |
| HDL cholesterol (mg·dL <sup>-1</sup> ) | 842   | 46 ± 15    | 830   | 51 ± 15     | <.0001 |
| LDL cholesterol (mg·dL <sup>-1</sup> ) | 836   | 103 ± 42   | 830   | 109 ± 40    | .002   |
| Bilirubin (mg·dL <sup>-1</sup> )       | 1,102 | 0.66 ± 0.4 | 1,000 | 0.69 ± 0.67 | .5     |
| Hematocrit (%)                         | 1,114 | 37 ± 5.5   | 1,010 | 38 ± 5.5    | <.0001 |

**Concomitant procedures**

|                     |       |          |       |          |        |
|---------------------|-------|----------|-------|----------|--------|
| Mitral valve repair | 1,204 | 64 (5.3) | 1,082 | 13 (1.2) | <.0001 |
|---------------------|-------|----------|-------|----------|--------|

|                                       |       |             |       |              |        |
|---------------------------------------|-------|-------------|-------|--------------|--------|
| Tricuspid valve repair                | 1,204 | 26 (2.2)    | 1,082 | 27 (2.5)     | .6     |
| Aortic endarterectomy                 | 1,204 | 85 (7.1)    | 1,082 | 40 (3.7)     | .0004  |
| Any atrial fibrillation procedure     | 1,204 | 72 (6.0)    | 1,082 | 71 (6.6)     | .6     |
| Septal myectomy                       | 1,204 | 8 (0.66)    | 1,082 | 26 (2.4)     | .0006  |
| ASD/PFO suture closure                | 1,204 | 19 (1.6)    | 1,082 | 18 (1.7)     | .9     |
| <b><i>Aortic valve prosthesis</i></b> |       |             |       |              |        |
| Valve size (mm)                       | 1,204 |             | 1,082 |              | <.0001 |
| 19                                    |       | 160 (13)    |       | 190 (18)     |        |
| 21                                    |       | 347 (29)    |       | 319 (29)     |        |
| 23                                    |       | 470 (39)    |       | 316 (29)     |        |
| 25                                    |       | 187 (16)    |       | 207 (19)     |        |
| 27                                    |       | 35 (2.9)    |       | 44 (4.1)     |        |
| 29                                    |       | 5 (0.42)    |       | 6 (0.55)     |        |
| Standardized size (Z-value)           | 1,196 | -0.4 ± 0.89 | 1,066 | -0.42 ± 1.01 | .5     |

a. Patients with data available.

Key: *AS*, aortic stenosis, *ASD/PFO*, atrial septal defect/patent foramen ovale, *BSA*, body surface area; *BUN*, blood urea nitrogen; *CAD*, coronary artery disease, *HDL*, high-density lipoprotein; *LAD*, left anterior descending coronary artery; *LCx*, left circumflex coronary artery; *LDL*, low-density lipoprotein; *LMT*, left main trunk; *NYHA*, New York Heart Association; *RCA*, right coronary artery; *SD*, standard deviation.

**eTable 4b. Preoperative Echocardiographic Measurements in Unmatched vs. Matched Patients with Severe Aortic Stenosis and Coronary Artery Disease**

| Variable                         | Unmatched<br>(n=1,204) |             | Matched<br>(n=1,082) |             | P      |
|----------------------------------|------------------------|-------------|----------------------|-------------|--------|
|                                  | n <sup>a</sup>         | Mean ± SD   | n <sup>a</sup>       | Mean ± SD   |        |
| <i>Aortic valve hemodynamics</i> |                        |             |                      |             |        |
| Area (cm <sup>2</sup> )          | 1,060                  | 0.69 ± 0.15 | 932                  | 0.66 ± 0.14 | <.0001 |
| Mean gradient (mmHg)             | 1,085                  | 41 ± 15     | 957                  | 49 ± 16     | <.0001 |
| Peak gradient (mmHg)             | 1,086                  | 69 ± 24     | 956                  | 84 ± 24     | <.0001 |
| <i>LV geometry</i>               |                        |             |                      |             |        |
| Morphology                       |                        |             |                      |             |        |
| Posterior wall thickness (cm)    | 989                    | 1.3 ± 0.24  | 905                  | 1.3 ± 0.22  | .4     |
| Septal thickness (cm)            | 1,000                  | 1.5 ± 0.32  | 915                  | 1.5 ± 0.29  | .06    |
| Mass index (g·m <sup>-2</sup> )  | 977                    | 137 ± 40    | 886                  | 131 ± 42    | .0002  |
| End-diastolic diameter (cm)      | 1,007                  | 4.8 ± 0.80  | 927                  | 4.6 ± 0.82  | <.0001 |
| End-systolic diameter (cm)       | 991                    | 3.2 ± 0.93  | 920                  | 3.0 ± 0.85  | <.0001 |
| Function                         |                        |             |                      |             |        |
| Ejection fraction (%)            | 1,128                  | 48 ± 13     | 1,006                | 54 ± 11     | <.0001 |
| <i>Left atrium</i>               |                        |             |                      |             |        |
| Diameter (cm)                    | 979                    | 4.4 ± 0.75  | 857                  | 4.2 ± 0.75  | <.0001 |

a. Patients with data available.

Key: CAD, coronary artery disease; SD, standard deviation.

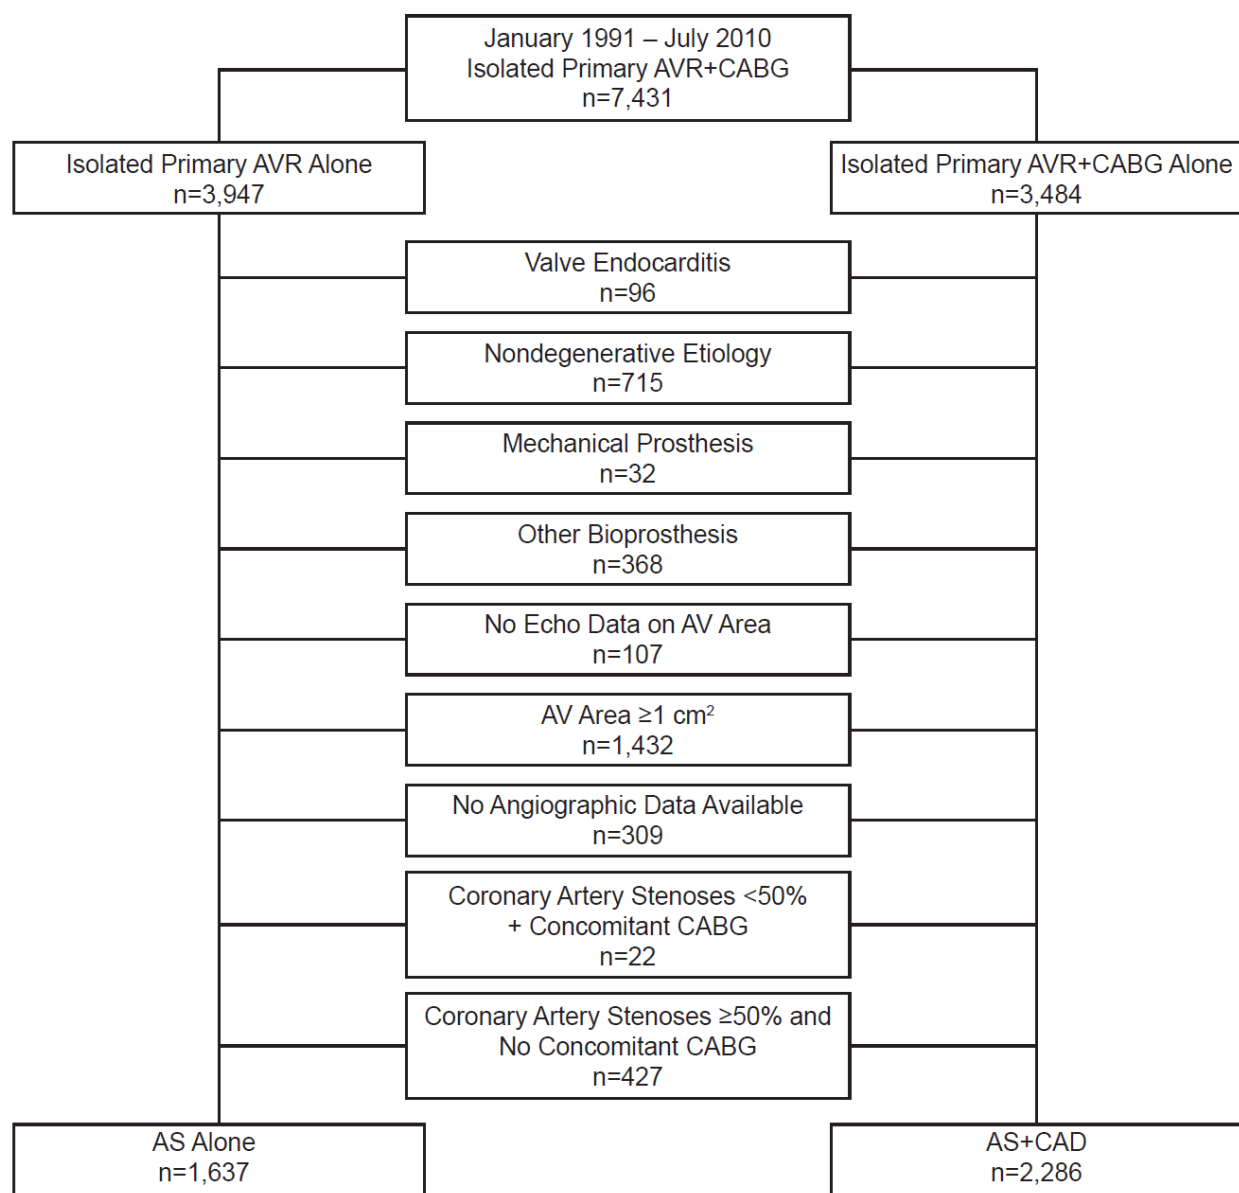

**eFigure 1.** CONSORT-style diagram depicting how study groups were formed from the entire cohort of 7,431 patients.

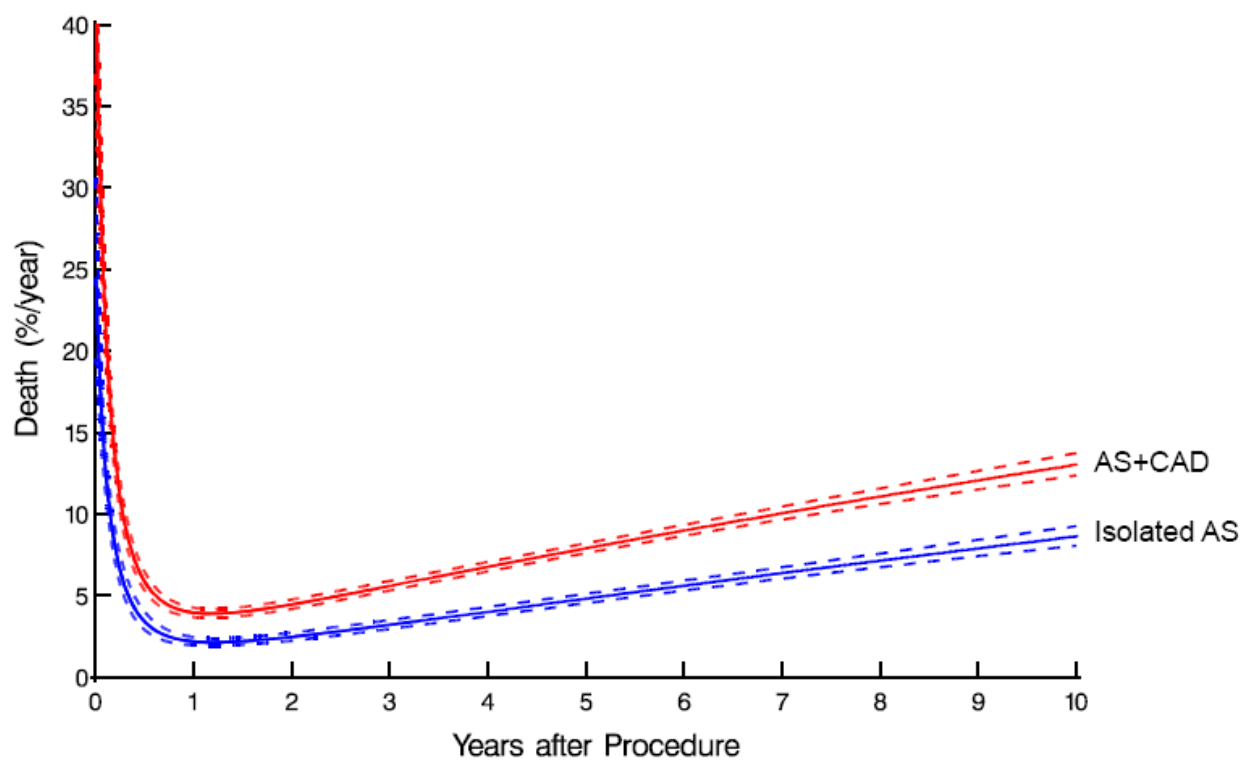

**eFigure 2.** Unadjusted instantaneous risk of death (hazard function) among patients with isolated aortic stenosis (blue; Isolated AS) vs. aortic stenosis with coronary artery disease (red; AS+CAD).

**A,** Instantaneous risk of death. Solid lines represent parametric estimates enclosed within asymmetric confidence bands equivalent to  $\pm 1$  standard error.

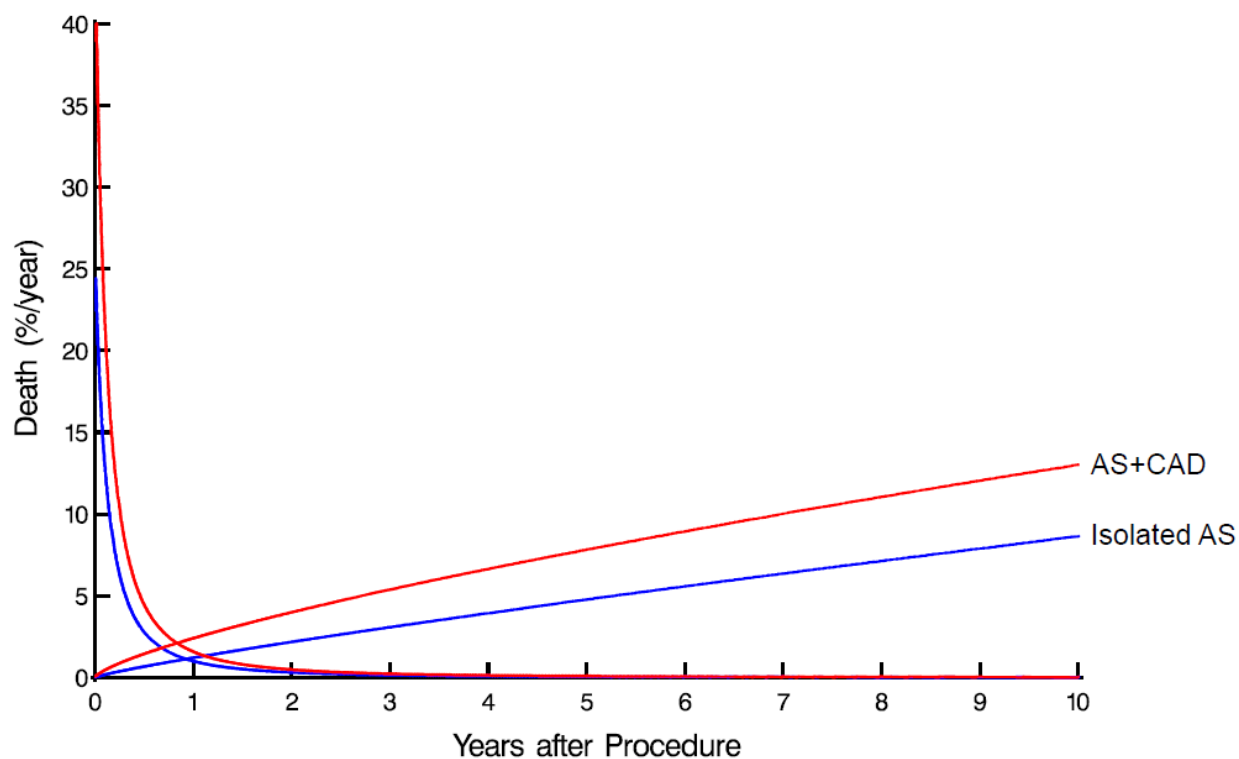

**eFigure 2.** Unadjusted instantaneous risk of death (hazard function) among patients with isolated aortic stenosis (blue; Isolated AS) vs. aortic stenosis with coronary artery disease (red; AS+CAD).

**B,** Components of the temporal decomposition of hazard that constitute *early* declining phase of risk and the *late* rising phase of risk.

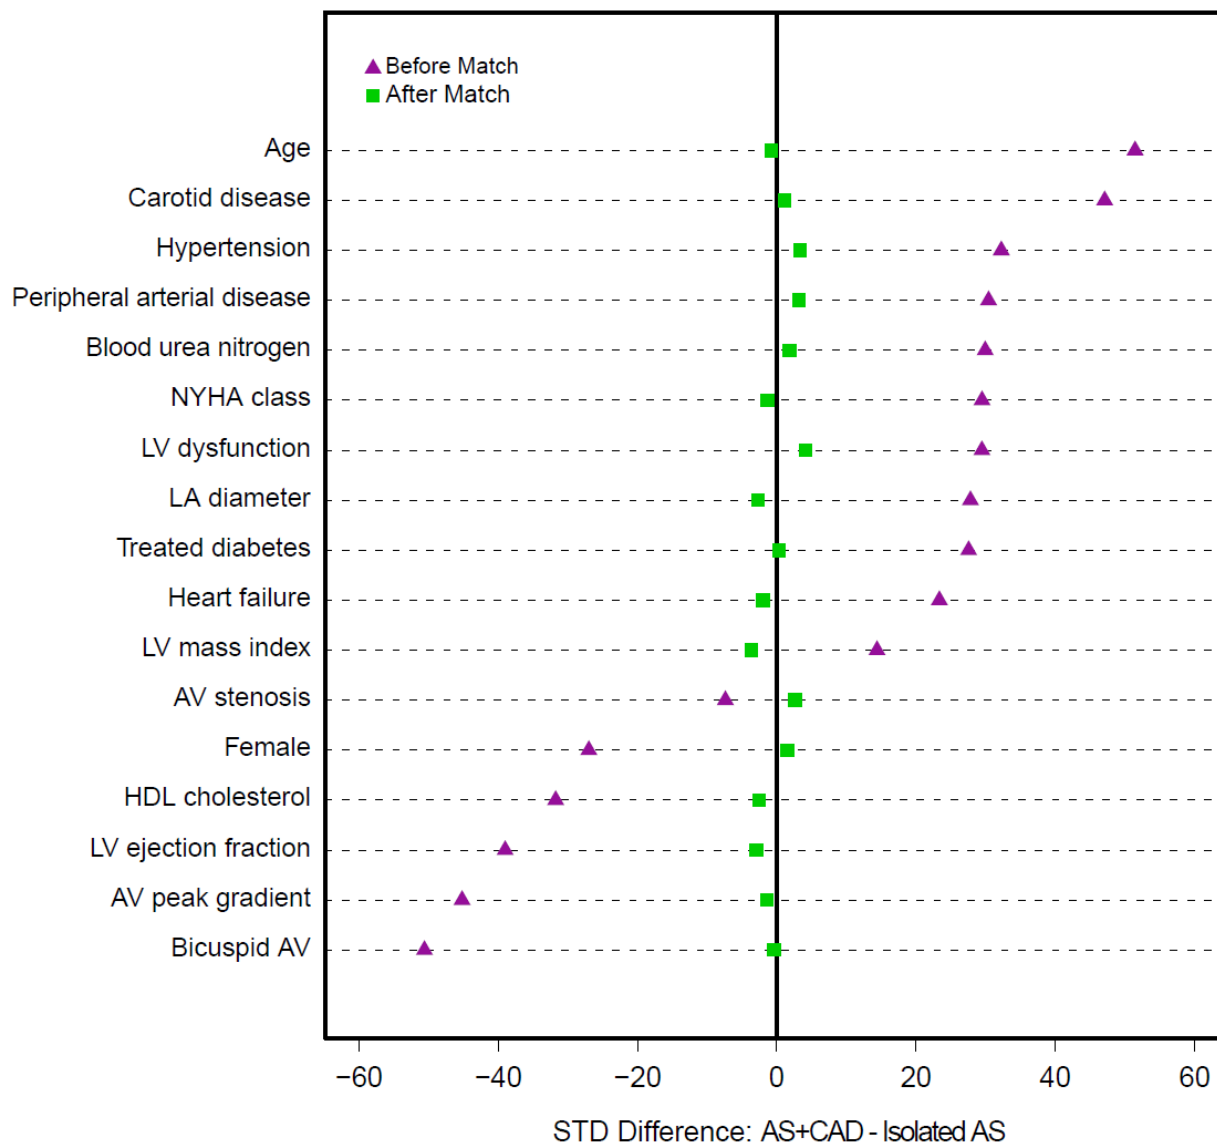

**eFigure 3.** Covariable balance for selected variables using standardized differences (STD) between patients with isolated severe aortic stenosis (AS) and those with coronary artery disease (AS+CAD) before (purple triangles) and after (green squares) matching (1). Key: AV, aortic valve; HDL, high-density lipoprotein; LA, left atrial; LV, left ventricular; NYHA, New York Heart Association.

- 
1. Austin PC, Mamdani MM. A comparison of propensity score methods: a case study estimating the effectiveness of post-AMI statin use. *Stat Med* 2006;25:2084-106.



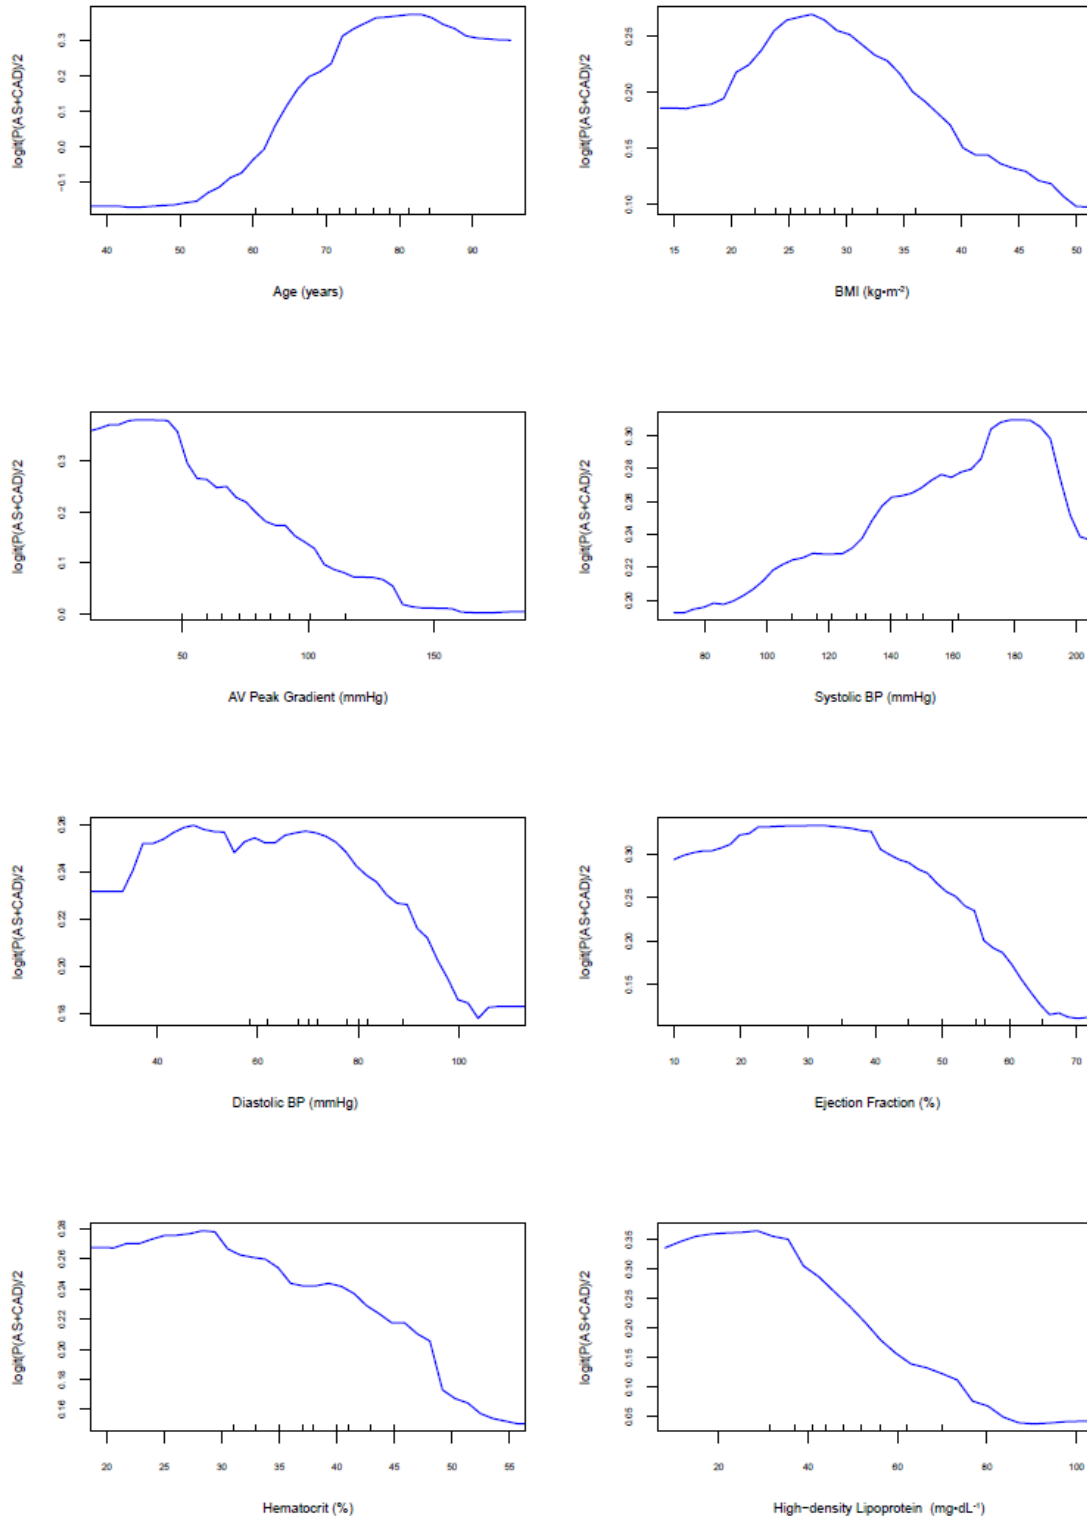

**eFigure 4.** Partial dependence plot for selected predictor variables (see Table 3) from random forest prediction (eAppendix 2) of belonging to the aortic stenosis plus coronary artery disease

(AS+CAD) group. Partial dependence (vertical axis) is depicted as probability of being in the AS+CAD group for different values of the variable depicted along the horizontal axis after averaging out the effect of other variables in the model. Hash marks at the bottom of horizontal axis indicate the decile values of the variable being depicted.

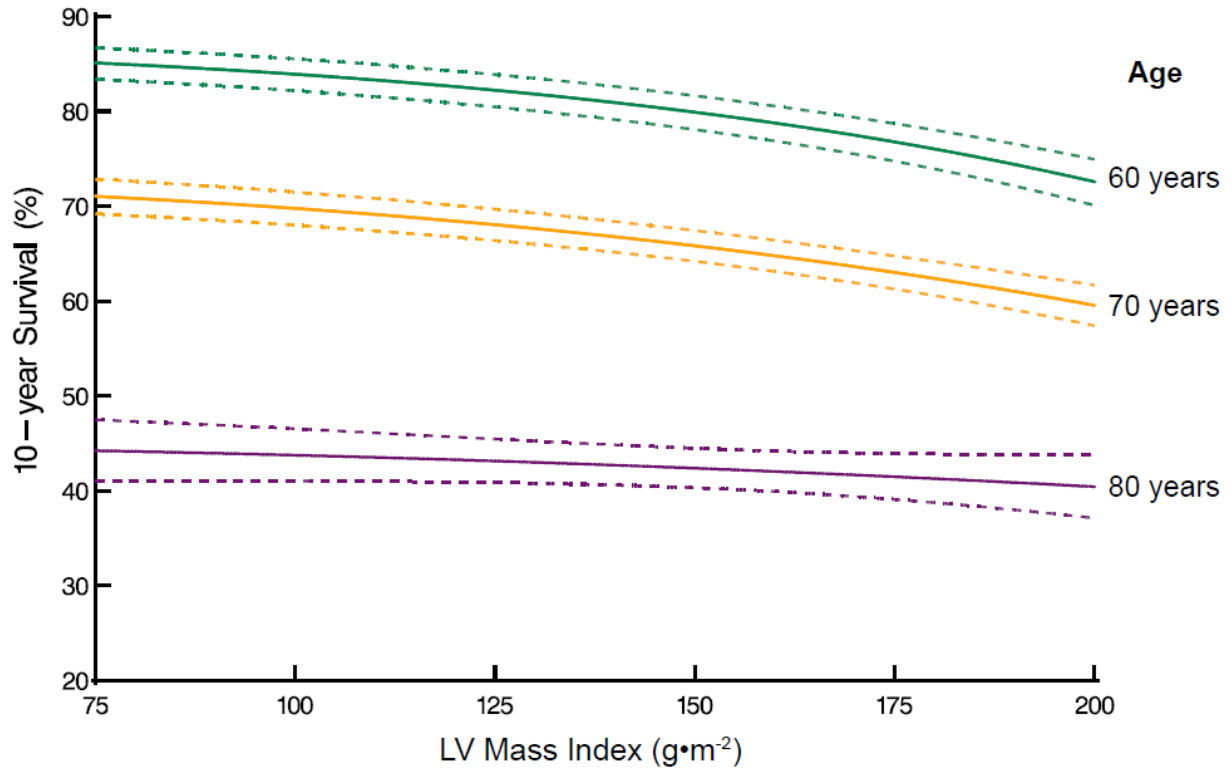

**eFigure 5.** Nomograms depicting 10-year survival after aortic valve replacement, illustrating interactions observed in Table 4.

**A,** Illustration of interaction effect of age and LV mass index.

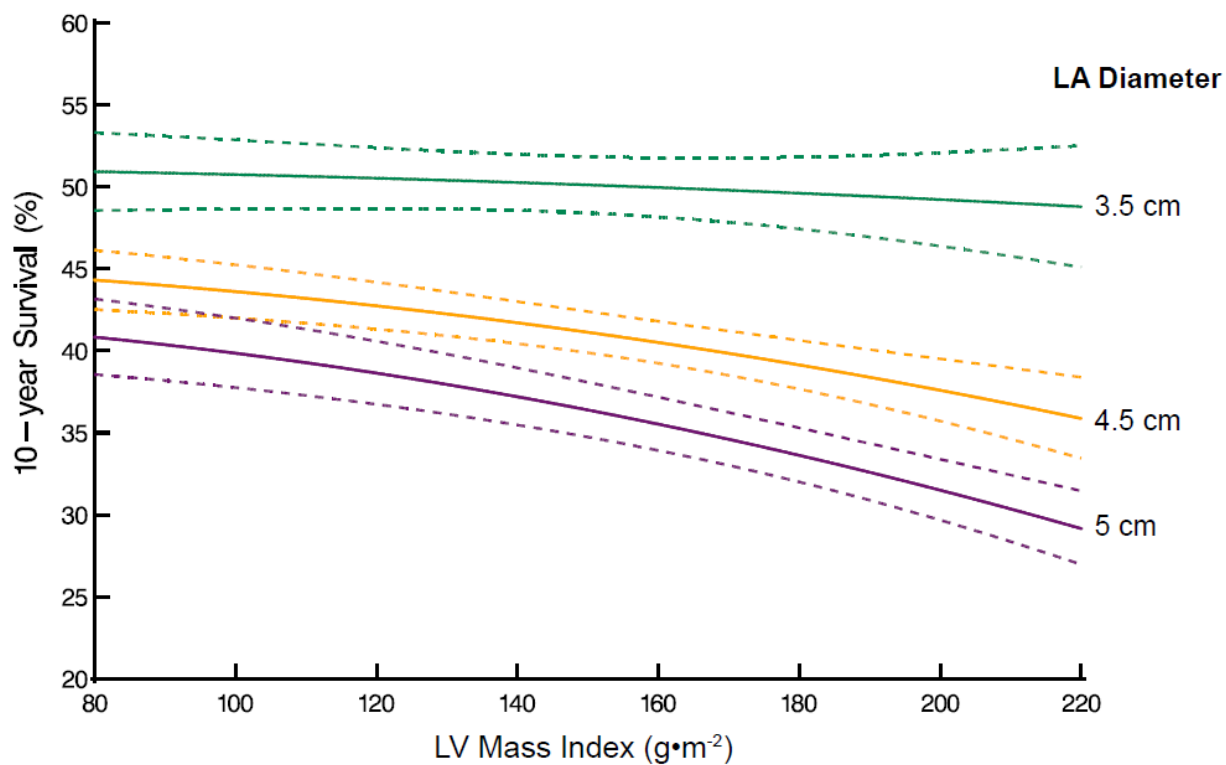

**eFigure 5.** Nomograms depicting 10-year survival after aortic valve replacement, illustrating interactions observed in Table 4.

**B,** Illustration of interaction effect: age, LV mass index, and left atrial (LA) diameter.

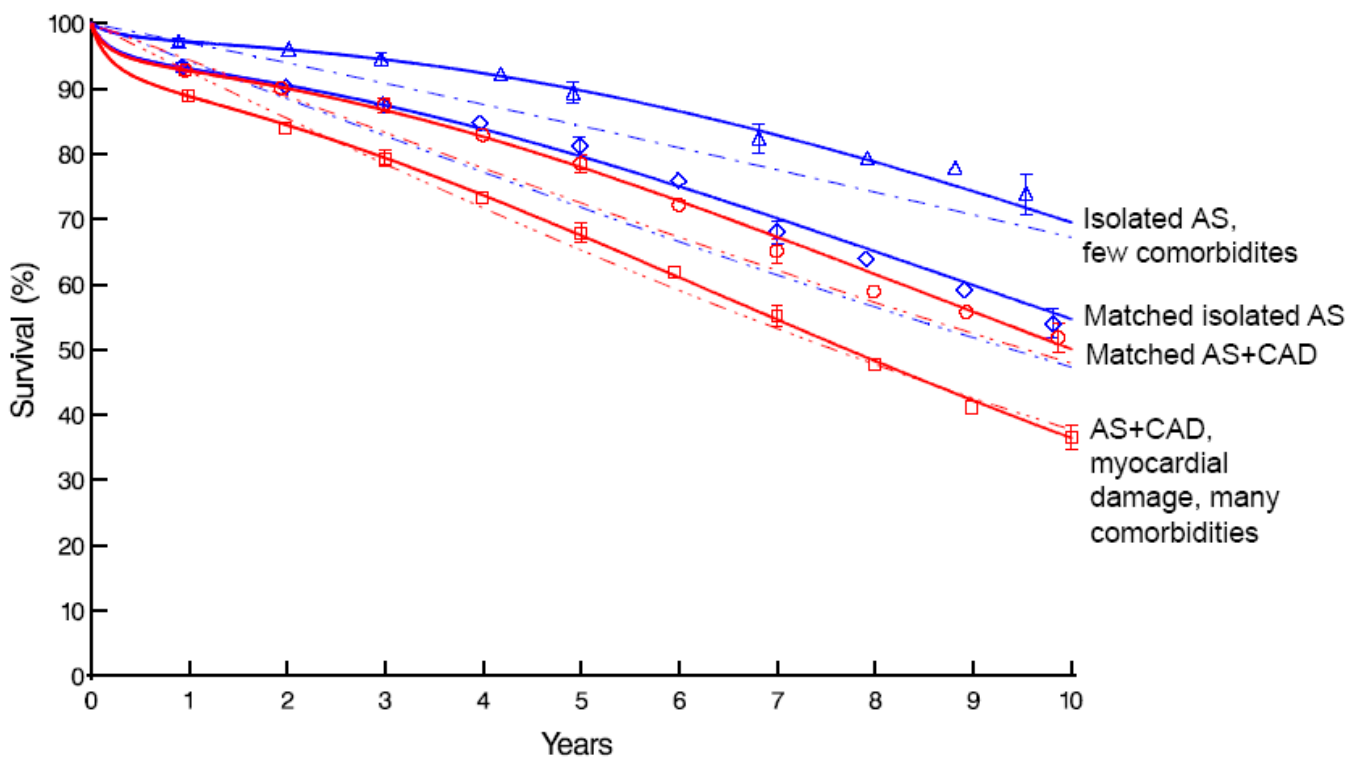

**eFigure 6.** Survival after aortic valve replacement (AVR) for patients with isolated severe aortic stenosis (AS) in the matched vs. unmatched subgroups referenced to age-sex-race-matched survival of the U.S. population. Each symbol represents a death, with vertical bars representing confidence limits equivalent to  $\pm 1$  standard error. Red curves with open circles and open squares represent patients with AS plus coronary artery disease (AS+CAD), matched and unmatched, respectively. Blue curves with open triangles and open diamonds represent isolated AS patients, each with their respective matched and unmatched curves. Dot-dash lines are U.S. life table age-sex-race-matched survival curves for each subgroup.

## **eAppendix 1. Variables Used in Analyses**

### **Patient**

#### ***Demographic***

Age (y)<sup>\*</sup>, gender<sup>\*</sup>, race<sup>\*</sup>, weight (kg), height (cm), body surface area (m<sup>2</sup>), body mass index (kg•m<sup>-2</sup>)<sup>\*</sup>

#### ***Symptoms***

New York Heart Association functional class (I-IV)<sup>\*</sup>, Canadian angina class, emergency operation, syncope<sup>\*</sup>, dyspnea on exertion<sup>\*</sup>, dyspnea at rest<sup>\*</sup>, paroxysmal nocturnal dyspnea<sup>\*</sup>, orthopnea<sup>\*</sup>

#### ***Ventricular dysfunction***

Previous myocardial infarction<sup>\*</sup>, degree of left ventricular dysfunction (1=none, 2=mild, 3=moderate, 4=moderately severe, 5=severe)

#### ***Aortic valve pathophysiology***

Aortic valve stenosis, mixed aortic stenosis and regurgitation, bicuspid valve<sup>\*</sup>, orifice area (cm<sup>2</sup>)<sup>\*</sup>, mean gradient (mmHg)<sup>\*</sup>, peak gradient (mmHg)<sup>\*</sup>

#### ***Other functional valve pathophysiology***

Mitral regurgitation<sup>\*</sup>, mitral stenosis<sup>\*</sup>, tricuspid regurgitation<sup>\*</sup>

#### ***Coronary artery disease***

Left main trunk stenosis (>0%, ≥50%), left anterior descending coronary artery stenosis (>0%, ≥50%), left circumflex coronary artery stenosis (>0%, ≥50%), right circumflex coronary artery stenosis (>0%, ≥50%)

***Left atrium***

Left atrial diameter (cm)\*, volume (mL), volume index ( $\text{mL}\cdot\text{m}^{-2}$ )

***Left ventricle***

*Morphology:* Inner diameter in diastole (cm), diastolic volume (mL), diastolic volume index ( $\text{mL}\cdot\text{m}^{-2}$ )\*, inner diameter in systole (cm), systolic volume (mL), systolic volume index ( $\text{mL}\cdot\text{m}^{-2}$ ), posterior wall thickness (cm), septal thickness (cm), relative wall thickness (wall stress), mass (g), mass index ( $\text{g}\cdot\text{m}^{-2}$ )\*

*Function:* Ejection fraction (%)\*, fractional shortening

***Other cardiac comorbidity***

Heart failure\*, hypertension\*, systolic blood pressure (mmHg)\*, diastolic blood pressure (mmHg)\*, complete heart block/pacer\*, atrial fibrillation\*, ventricular arrhythmia\*

***Noncardiac comorbidity***

Treated diabetes\*, insulin-treated diabetes, peripheral arterial disease\*, smoking, carotid disease\*, stroke\*, chronic obstructive pulmonary disease\*, creatinine ( $\text{mg}\cdot\text{dL}^{-1}$ ), creatinine clearance, blood urea nitrogen ( $\text{mg}\cdot\text{dL}^{-1}$ )\*, bilirubin ( $\text{mg}\cdot\text{dL}^{-1}$ )\*, hematocrit (%)\*, total cholesterol ( $\text{mg}\cdot\text{dL}^{-1}$ ), high-density lipoprotein ( $\text{mg}\cdot\text{dL}^{-1}$ )\*, low-density lipoprotein ( $\text{mg}\cdot\text{dL}^{-1}$ )\*, triglycerides ( $\text{mg}\cdot\text{dL}^{-1}$ )\*

**Procedure**

*AV Prosthesis:* Valve size, in-vitro effective orifice area (EOA), Z-value\*, Z-value for EOA, ratio: valve area/body surface area, ratio: EOA/body surface area, internal valve area, efficiency: EOA/internal area

*Concomitant Operation:* Mitral valve repair or replacement\*, tricuspid valve repair or replacement\*, aortic endarterectomy\*, septal myectomy\*, atrial septal defect/patent foramen ovale suture closure\*, internal thoracic artery used for coronary artery bypass grafting,<sup>b</sup> surgery for atrial fibrillation\*

### **Experience**

Date of operation (years since 1/1/1991)

---

**Note:** Asterisks indicate variables used for matching in propensity analysis.

a. Because of the group definition, only variables with stenosis >0% were considered in the aortic valve replacement group analyses.

b. Variable considered only in AS+CAD group.



## **eAppendix 2: Partial Dependence Plots Using Random Forest Classification**

We used random forests (RF) classification (42) to identify and depict relationships between selected baseline variables and the likelihood of being in the AS+CAD group. The classification tree method constructs a tree by recursive binary partitioning into regions that are increasingly homogeneous with respect to AS+CAD. However, Breiman (42) demonstrated that classification accuracy can be improved substantially by aggregating results of many trees, each grown from a “bootstrap” dataset formed by randomly sampling the data with replacement to build a dataset of equal size to the original. About two-thirds of patients are unique in each sample and one-third duplicates. We used 1,000 trees for RF classification modeling using the variables listed in eAppendix 1, with 20 variables available for splitting at each node. We implemented the RF using “randomForest” package in R software (43). We prefer the RF approach when we want to depict the relationship (linear or nonlinear) between predictor and outcome variables because splits of continuous variables can occur at any set of values for each tree; by aggregating over a forest of trees, a near-continuous depiction can be obtained with no modeling assumptions (nonparametric).
